# Supplementary material for: Geographical Variation of Honey Bee (Apis mellifera L. 1758) Populations in South-Eastern Morocco: A Geometric Morphometric Analysis
Source: MDPI journal article supplement (doi:10.3390/insects13030288), 2022-03-15
Supplement: s1 [file s1]

**Supplementary Table S1.** Locations where honey bee samples were obtained from southeastern Morocco.

| Code | Area       | Location      | Hive type   | Latitude  | Longitude |
|------|------------|---------------|-------------|-----------|-----------|
| 1    | Errachidia | Aoufous       | modern      | 31.689083 | -4.17165  |
| 2    | Errachidia | Ibarbatene    | modern      | 31.979092 | -4.476538 |
|      |            | Ksar Ouled    |             |           |           |
| 4    | Errachidia | Saaidane      | modern      | 31.300800 | -4.324667 |
|      |            | Ksar Ouled    |             |           |           |
| 5    | Errachidia | Saaidane      | modern      | 31.300800 | -4.324667 |
| 6    | Errachidia | Merzouga 1    | modern      | 31.071838 | -4.035732 |
| 7    | Errachidia | Merzouga 1    | modern      | 31.071838 | -4.035732 |
| 8    | Errachidia | Merzouga 1    | modern      | 31.071838 | -4.035732 |
| 9    | Errachidia | Merzouga 1    | modern      | 31.071838 | -4.035732 |
| 10   | Errachidia | Merzouga 1    | modern      | 31.071838 | -4.035732 |
| 11   | Errachidia | Merzouga 1    | modern      | 31.071838 | -4.035732 |
| 12   | Errachidia | Merzouga 2    | modern      | 31.072400 | -4.035383 |
| 13   | Errachidia | Merzouga 2    | modern      | 31.072400 | -4.035383 |
| 14   | Errachidia | Merzouga 2    | modern      | 31.072400 | -4.035383 |
| 15   | Errachidia | Merzouga 2    | modern      | 31.072400 | -4.035383 |
| 16   | Errachidia | Merzouga 2    | modern      | 31.072400 | -4.035383 |
| 17   | Errachidia | Rissani       | modern      | 31.278083 | -4.203867 |
| 18   | Errachidia | Rissani       | modern      | 31.278083 | -4.203867 |
| 19   | Errachidia | Tahesnounte   | modern      | 31.345100 | -4.278433 |
| 20   | Errachidia | Tahesnounte   | modern      | 31.345100 | -4.278433 |
| 21   | Errachidia | Tighejdet     | modern      | 32.234156 | -4.63233  |
| 24   | Ouarzazate | Ait Zineb     | modern      | 30.982400 | -7.148517 |
| 25   | Ouarzazate | Ait Zineb     | modern      | 30.982400 | -7.148517 |
| 26   | Ouarzazate | Ait Zineb     | modern      | 30.982400 | -7.148517 |
| 27   | Ouarzazate | Amekchoud 1   | traditional | 31.219417 | -6.585267 |
| 28   | Ouarzazate | Amekchoud 1   | traditional | 31.219417 | -6.585267 |
| 29   | Ouarzazate | Amekchoud 1   | traditional | 31.219417 | -6.585267 |
| 30   | Ouarzazate | Amekchoud 2   | modern      | 31.221217 | -6.581833 |
| 31   | Ouarzazate | Amekchoud 2   | modern      | 31.221217 | -6.581833 |
| 32   | Ouarzazate | Amekchoud 2   | traditional | 31.221217 | -6.581833 |
| 33   | Ouarzazate | Asserssa      | modern      | 30.526633 | -7.15195  |
| 34   | Ouarzazate | Asserssa      | modern      | 30.526633 | -7.15195  |
| 35   | Ouarzazate | Asserssa      | modern      | 30.526633 | -7.15195  |
| 36   | Ouarzazate | Halouqte      | modern      | 30.705867 | -7.307917 |
| 37   | Ouarzazate | Halouqte      | modern      | 30.705867 | -7.307917 |
| 38   | Ouarzazate | Halouqte      | modern      | 30.705867 | -7.307917 |
| 39   | Ouarzazate | Iminoulaoune  | modern      | 31.299800 | -6.500117 |
| 40   | Ouarzazate | Iminoulaoune  | modern      | 31.299800 | -6.500117 |
| 41   | Ouarzazate | Iminoulaoune  | modern      | 31.299800 | -6.500117 |
| 42   | Ouarzazate | Ouled Arbia   | traditional | 31.047533 | -6.594533 |
| 43   | Ouarzazate | Ouled Ibrahim | modern      | 31.111050 | -6.581467 |
| 44   | Ouarzazate | Ouled Ibrahim | modern      | 31.111050 | -6.581467 |
| 45   | Ouarzazate | Ouled Ibrahim | modern      | 31.111050 | -6.581467 |
| 46   | Ouarzazate | Ouarzazate    | modern      | 30.918683 | -6.91995  |
| 47   | Ouarzazate | Ouarzazate    | modern      | 30.918683 | -6.91995  |
| 48   | Ouarzazate | Ouarzazate    | modern      | 30.918683 | -6.91995  |
| 49   | Ouarzazate | Timsal        | modern      | 31.271333 | -7.13825  |
| 50   | Ouarzazate | Timsal        | traditional | 31.271333 | -7.13825  |
| 51   | Ouarzazate | Timsal        | modern      | 31.271333 | -7.13825  |
| 52   | Ouarzazate | Timsal        | traditional | 31.271333 | -7.13825  |

Supplementary Table S1. (Continued)

| Code | Province   | Region            | Hive type   | Latitude  | Longitude |
|------|------------|-------------------|-------------|-----------|-----------|
| 53   | Ouarzazate | Timsal            | modern      | 31.271333 | -7.13825  |
| 54   | Ouarzazate | Timsal            | traditional | 31.271333 | -7.13825  |
|      |            | Ksar Lbour        |             |           |           |
| 3    | Tinghir    | Tinejdad          | modern      | 31.446600 | -5.169717 |
| 22   | Tinghir    | Tinejdad          | modern      | 31.512387 | -5.027543 |
| 23   | Tinghir    | Tinejdad          | modern      | 31.512387 | -5.027543 |
| 55   | Tinghir    | Ait Ibiren        | modern      | 31.450800 | -6.012117 |
| 56   | Tinghir    | Ait Ibiren        | modern      | 31.450800 | -6.012117 |
| 57   | Tinghir    | Ait Ali Ou Brahim | modern      | 31.469850 | -5.39865  |
| 58   | Tinghir    | Ait Ali Ou Brahim | modern      | 31.469850 | -5.39865  |
| 59   | Tinghir    | Anou n'Ou'achcha  | modern      | 31.292483 | -5.651533 |
| 60   | Tinghir    | Anou n'Ou'achcha  | modern      | 31.292483 | -5.651533 |
| 61   | Tinghir    | Anou n'Ou'achcha  | modern      | 31.292483 | -5.651533 |
| 62   | Tinghir    | Aït Toumort 1     | traditional | 31.400972 | -6.274639 |
| 63   | Tinghir    | Aït Toumort 1     | modern      | 31.400972 | -6.274639 |
| 64   | Tinghir    | Aït Toumort 1     | modern      | 31.400972 | -6.274639 |
| 65   | Tinghir    | Aït Toumort 2     | traditional | 31.451283 | -6.326083 |
| 66   | Tinghir    | Aït Toumort 2     | traditional | 31.451283 | -6.326083 |
| 67   | Tinghir    | Aït Toumort 2     | traditional | 31.451283 | -6.326083 |
| 68   | Tinghir    | Ikisse Amezdar    | modern      | 31.314600 | -5.640567 |
| 69   | Tinghir    | Ikisse Amezdar    | modern      | 31.314600 | -5.640567 |
| 70   | Tinghir    | Ikisse Amezdar    | modern      | 31.314600 | -5.640567 |
| 71   | Tinghir    | Ikisse Amezdar    | modern      | 31.314600 | -5.640567 |
|      |            | Souk El-Khémis    |             |           |           |
| 72   | Tinghir    | Dades             | traditional | 31.306167 | -6.033783 |
|      |            | Souk El-Khémis    |             |           |           |
| 73   | Tinghir    | Dades             | traditional | 31.306167 | -6.033783 |
|      |            | Souk El-Khémis    |             |           |           |
| 74   | Tinghir    | Dades             | traditional | 31.306167 | -6.033783 |
| 75   | Tinghir    | Tilmi             | modern      | 31.794867 | -5.776000 |
| 76   | Tinghir    | Tilmi             | modern      | 31.794867 | -5.776000 |
| 77   | Tinghir    | Tilmi             | modern      | 31.794867 | -5.776000 |
| 78   | Tinghir    | Timit             | traditional | 31.290150 | -5.554917 |
| 79   | Tinghir    | Timit             | traditional | 31.290150 | -5.554917 |
| 80   | Tinghir    | Timit             | traditional | 31.290150 | -5.554917 |
| 81   | Tinghir    | Timit             | traditional | 31.290150 | -5.554917 |
| 82   | Tinghir    | Tourza            | modern      | 31.234867 | -5.261467 |
| 83   | Tinghir    | Tourza            | modern      | 31.234867 | -5.261467 |
| 84   | Tinghir    | Tourza            | modern      | 31.234867 | -5.261467 |
| 85   | Zagora     | El Gloa           | modern      | 30.274917 | -6.476583 |
| 86   | Zagora     | El Gloa           | modern      | 30.274917 | -6.476583 |
| 87   | Zagora     | El Merja          | modern      | 30.183200 | -6.40225  |
| 88   | Zagora     | El Merja          | modern      | 30.183200 | -6.40225  |
| 89   | Zagora     | Faija             | modern      | 30.176033 | -6.123933 |
| 90   | Zagora     | Ighereghar        | modern      | 30.678450 | -6.293967 |
| 91   | Zagora     | Ighereghar        | modern      | 30.678450 | -6.293967 |
| 92   | Zagora     | Ighereghar        | modern      | 30.678450 | -6.293967 |
| 93   | Zagora     | Ighereghar        | modern      | 30.678450 | -6.293967 |
| 94   | Zagora     | Ighereghar        | modern      | 30.678450 | -6.293967 |
| 95   | Zagora     | Intliten          | modern      | 30.746233 | -6.436647 |
| 96   | Zagora     | Intliten          | modern      | 30.746233 | -6.436647 |
| 97   | Zagora     | Intliten          | modern      | 30.746233 | -6.436647 |

**Supplementary Table S1.** (Continued)

| <b>Code</b> | <b>Province</b> | <b>Region</b> | <b>Hive type</b> | <b>Latitude</b> | <b>Longitude</b> |
|-------------|-----------------|---------------|------------------|-----------------|------------------|
| 98          | Zagora          | Intliten      | modern           | 30.746233       | -6.436647        |
| 99          | Zagora          | Intliten      | modern           | 30.746233       | -6.436647        |
| 100         | Zagora          | Tamnougalt 1  | modern           | 30.675000       | -6.396767        |
| 101         | Zagora          | Tamnougalt 1  | modern           | 30.675000       | -6.396767        |
| 102         | Zagora          | Tamnougalt 1  | modern           | 30.675000       | -6.396767        |
| 103         | Zagora          | Tamnougalt 2  | modern           | 30.678190       | -6.386156        |
| 104         | Zagora          | Tamnougalt 2  | modern           | 30.678190       | -6.386156        |
| 105         | Zagora          | Tamnougalt 2  | modern           | 30.678190       | -6.386156        |
| 106         | Zagora          | Tighremet     | modern           | 30.854100       | -5.838850        |
| 107         | Zagora          | Tighremet     | modern           | 30.854100       | -5.838850        |
| 108         | Zagora          | Tighremet     | modern           | 30.854100       | -5.838850        |
| 109         | Zagora          | Tighremet     | modern           | 30.854100       | -5.838850        |
| 110         | Zagora          | Tighremet     | modern           | 30.854100       | -5.838850        |
